# Supplementary material for: Charged metabolite biomarkers of food intake assessed via plasma metabolomics in a population-based observational study in Japan
Source: PubMed Central journal article supplement (PMC7875413; doi:10.1371/journal.pone.0246456), 2021-02-10
Supplement: pone.0246456.s001.pdf [file pone.0246456.s001.pdf]

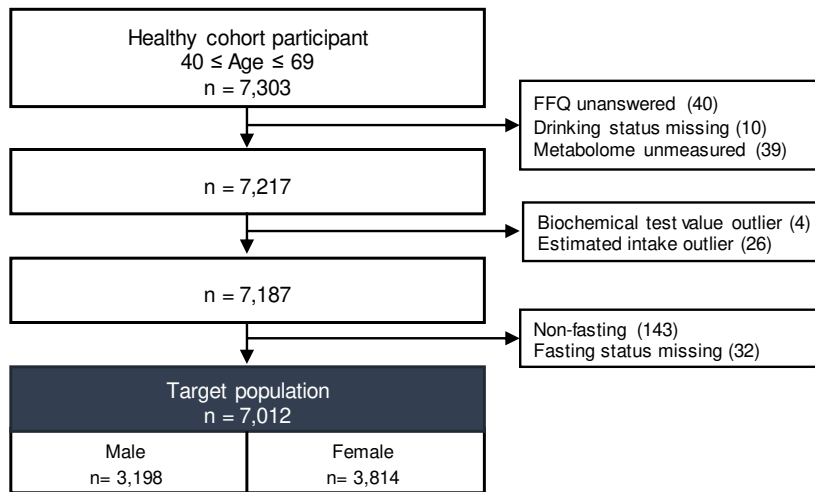

**S1 Fig. Flow diagram of participant inclusion and exclusion in the present study**
