# Supplementary material for: Charged metabolite biomarkers of food intake assessed via plasma metabolomics in a population-based observational study in Japan
Source: PubMed Central journal article supplement (PMC7875413; doi:10.1371/journal.pone.0246456), 2021-02-10
Supplement: pone.0246456.s002.pdf [file pone.0246456.s002.pdf]

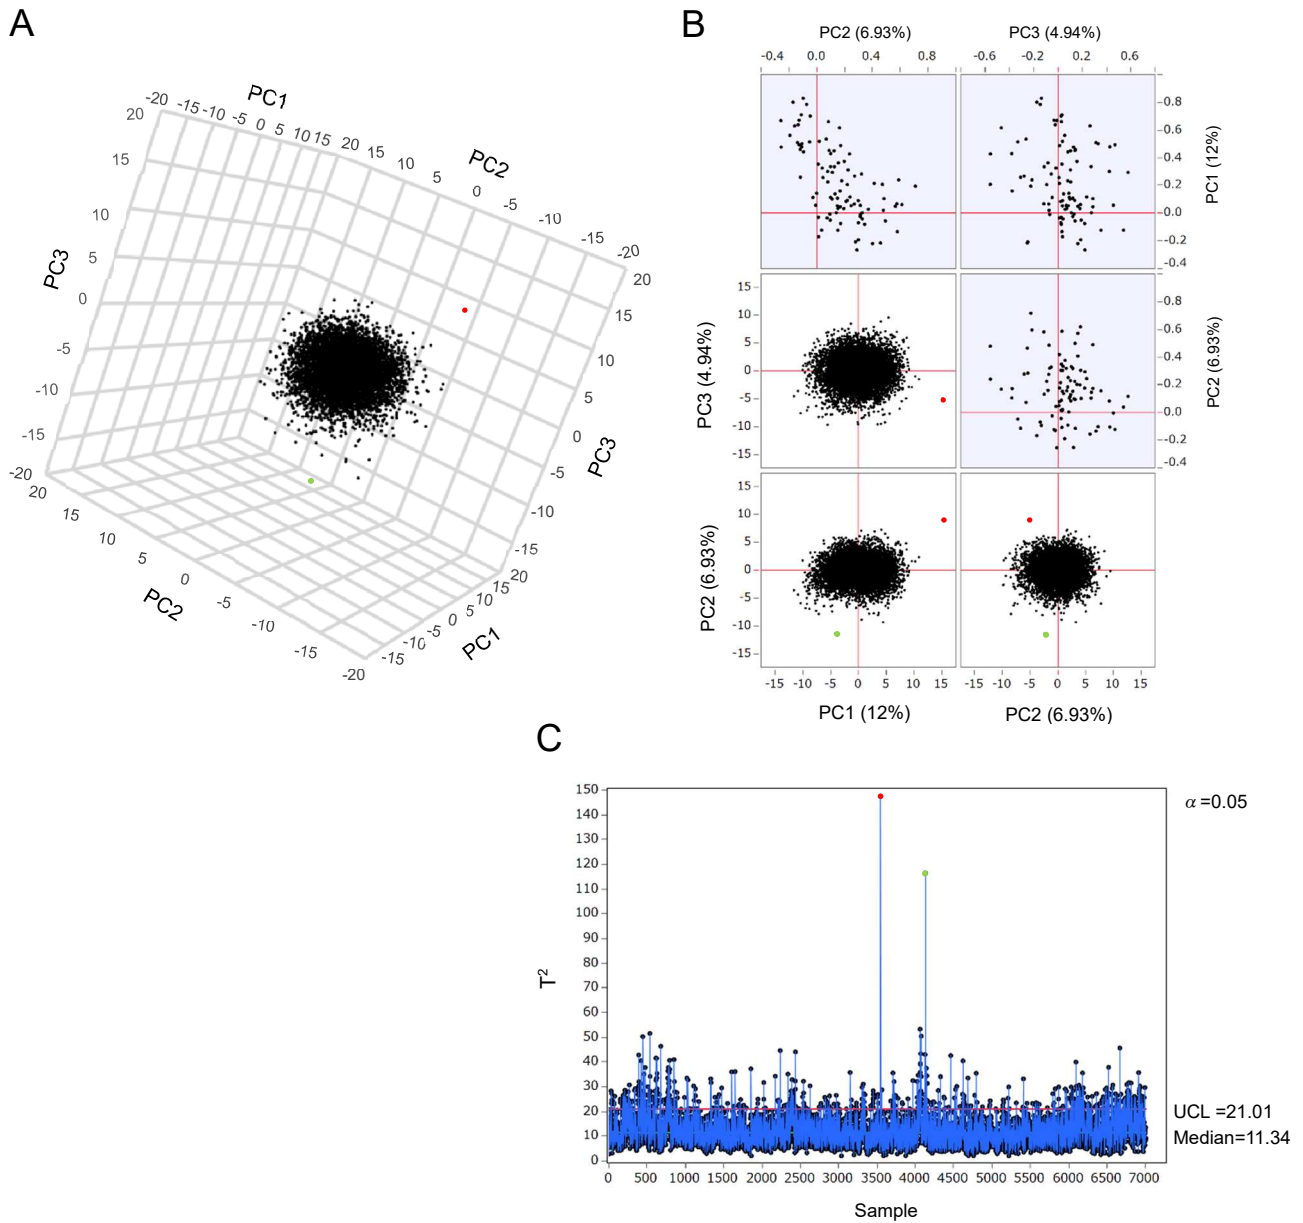

**S2 Fig. Outlier detection analysis.** Principal component (PC) analysis was executed for detecting outliers and excluded two samples from the analysis beforehand. (A) 3-D score plots for PC1, PC2 and PC3, (B) 2-D scatter plots of scores and loadings for PC1, PC2 and PC3, and (C)  $T^2$  for 12 principal components. UCL, upper control limit
