# Supplementary material for: Charged metabolite biomarkers of food intake assessed via plasma metabolomics in a population-based observational study in Japan
Source: PubMed Central journal article supplement (PMC7875413; doi:10.1371/journal.pone.0246456), 2021-02-10
Supplement: pone.0246456.s004.pdf [file pone.0246456.s004.pdf]

**S1 Table. Questionnaire contents of the FFQ and the Lifestyle Questionnaire****A. List of food included in the questionnaires**

| Staple food                                                |
|------------------------------------------------------------|
| Rice                                                       |
| Bread (e.g. white bread, pastry)                           |
| Noodles (wheat e.g. Japanese noodle, Chinese noodle)       |
| Soba (buckwheat noodle)                                    |
| Food item                                                  |
| 1 Margarine                                                |
| 2 Butter                                                   |
| 3 Milk                                                     |
| 4 Yogurt                                                   |
| 5 Miso soup                                                |
| 6 Tofu (cold/boiled)                                       |
| 7 Natto (fermented soy food), soybean                      |
| 8 Egg                                                      |
| 9 Chicken                                                  |
| 10 Beef, Pork                                              |
| 11 Liver                                                   |
| 12 Ham, sausage, bacon, salami-sausage                     |
| 13 Fish                                                    |
| 14 Bone-edible small fish                                  |
| 15 Canned tuna                                             |
| 16 Squid, octopus, shrimp, crab                            |
| 17 Shellfish (e.g. clam, oyster)                           |
| 18 Fish roe (e.g. cod fish roe, salted salmon roe)         |
| 19 Processed fish food (e.g. kamaboko, chikuwa)            |
| 20 Fried soy product (e.g. ganmodoki, astu-age)            |
| 21 Potatoes (e.g. potato, sweet-potato, taro)              |
| 22 Pumpkin                                                 |
| 23 Carrot                                                  |
| 24 Broccoli                                                |
| 25 Green leafy vegetables (e.g. spinach, komatsuna)        |
| 26 Other carotenoid-rich vegetables (e.g. green pepper)    |
| 27 Cabbage                                                 |
| 28 Japanese radish                                         |
| 29 Dried radish                                            |
| 30 Burdock, bamboo shoot                                   |
| 31 Other light vegetables (e.g. cucumber, onion, lettuce)  |
| 32 Mushrooms (e.g. shiitake, shimeji, enoki)               |
| 33 Seaweeds (e.g. hijiki, kombu)                           |
| 34 Mayonnaise (including salad dressed with mayonnaise)    |
| 35 Deep fried food                                         |
| 36 Stir fried food                                         |
| 37 Mandarin, orange, grapefruit                            |
| 38 Other fruits (e.g. strawberry, kiwi, apple, watermelon) |
| 39 Peanuts, almond                                         |
| 40 Western confectioneries (e.g. cake, cream puff)         |
| 41 Japanese confectioneries (e.g. manju)                   |
| 42 Green tea                                               |
| 43 Coffee                                                  |
| Alcohol                                                    |
| 1 Beer                                                     |
| 2 Sake                                                     |
| 3 Shochu                                                   |
| 4 Whisky                                                   |
| 5 Wine                                                     |
| 6 Others (e.g. plum wine, chuhai)                          |

**B. Frequency and quantity**

| Staple food (asked at breakfast, lunch and dinner) |                                |
|----------------------------------------------------|--------------------------------|
| Never or seldom                                    | Number of portions per serving |
| 1-3 times per month                                | Number of portions per serving |
| 1-2 times per week                                 | Number of portions per serving |
| 3-4 times per week                                 | Number of portions per serving |
| 5-6 times per week                                 | Number of portions per serving |
| Everyday                                           | Number of portions per serving |
| Food item                                          | Weight                         |
| Never or seldom                                    | 0.05                           |
| 1-3 times per month                                | 0.1                            |
| 1-2 times per week                                 | 0.2                            |
| 3-4 times per week                                 | 0.5                            |
| 5-6 times per week                                 | 0.8                            |
| Once per day                                       | 1                              |
| Twice per day                                      | 2                              |
| Three or more times per day                        | 3                              |
| Alcohol                                            |                                |
| Never                                              | -                              |
| Number of days per month                           | Number of drinks per occasion  |
| Number of days per week                            | Number of drinks per occasion  |

The questionnaires were created based on the semi-quantitative food frequency questionnaire developed by the Department of Health Promotion and Preventive Medicine, Graduate School of Medicine, Nagoya City University.

Ref.) Tokudome S, Got C, Imaeda N, Tokudome Y, Ikeda M, Maki S. Development of a data-based short food frequency questionnaire for assessing nutrient intake by middle-aged Japanese. *Asian Pacific journal of cancer prevention: APJCP*. 2004; 5(1):40-3.
