# Supplementary material for: Charged metabolite biomarkers of food intake assessed via plasma metabolomics in a population-based observational study in Japan
Source: PubMed Central journal article supplement (PMC7875413; doi:10.1371/journal.pone.0246456), 2021-02-10
Supplement: pone.0246456.s005.pdf [file pone.0246456.s005.pdf]

**S2 Table. Instruments and analytical conditions**

| <b>Instruments</b>           |                                         |                                                                                                                                                                                                                                               |
|------------------------------|-----------------------------------------|-----------------------------------------------------------------------------------------------------------------------------------------------------------------------------------------------------------------------------------------------|
| CE-TOF-MS                    | Agilent 7100 CE system                  | (Agilent Technologies, Waldbronn, Germany)                                                                                                                                                                                                    |
|                              | Agilent 6224 LC/MS TOF system           | (Agilent Technologies, Santa Clara, CA, USA)                                                                                                                                                                                                  |
|                              | Agilent 1260 series isocratic HPLC pump | (Agilent Technologies, Santa Clara, CA, USA)                                                                                                                                                                                                  |
|                              | G1603A Agilent CE-MS adapter kit        | (Agilent Technologies, Santa Clara, CA, USA)                                                                                                                                                                                                  |
|                              | G1607A Agilent CE-ESI-MS sprayer kit    | (Agilent Technologies, Santa Clara, CA, USA)                                                                                                                                                                                                  |
| Software                     | CE: Agilent Chemstation                 | (Agilent Technologies, Waldbronn, Germany)                                                                                                                                                                                                    |
|                              | TOF-MS: Agilent MassHunter              | (Agilent Technologies, Santa Clara, CA, USA)                                                                                                                                                                                                  |
|                              | Raw data analysing: MasterHand          | (proprietary software)                                                                                                                                                                                                                        |
| <b>Analytical conditions</b> |                                         |                                                                                                                                                                                                                                               |
| Cationic mode                |                                         |                                                                                                                                                                                                                                               |
|                              | Column                                  | Fused-silica capillary column (50 $\mu\text{m}$ i.d. $\times$ 100 cm total length)                                                                                                                                                            |
|                              | Electrolyte                             | Formic acid (1 M)                                                                                                                                                                                                                             |
|                              | Sample injection                        | 5 kPa for 3s (approximately 3 nL)                                                                                                                                                                                                             |
|                              | Applied voltage                         | 30 kV                                                                                                                                                                                                                                         |
|                              | Sheath liquid                           | Methanol/water (50%v/v) containing 0.1 $\mu\text{M}$ Hexakis                                                                                                                                                                                  |
|                              | Mass flow rate                          | 10 $\mu\text{L}/\text{min}$                                                                                                                                                                                                                   |
|                              | Reference standards                     | $^{13}\text{C}$ isotopic ion of the protonated methanol dimer ( $2\text{MeOH} + \text{H}$ ) $^+$ , $m/z$ 66.06306<br>Protonated Hexakis ( $\text{M} + \text{H}$ ) $^+$ , $m/z$ 622.02896                                                      |
|                              | Mass spectra                            | 1.5 cycles/s from $m/z$ 50 to 1000                                                                                                                                                                                                            |
| Anionic mode                 |                                         |                                                                                                                                                                                                                                               |
|                              | Column                                  | COSMO(+) capillary column (Nacalai Tesque, Kyoto, Japan)                                                                                                                                                                                      |
|                              | Electrolyte                             | Ammonium acetate solution (50 mM, pH 8.5)                                                                                                                                                                                                     |
|                              | Sample injection                        | 5 kPa for 30 s (approximately 30 nL)                                                                                                                                                                                                          |
|                              | Applied voltage                         | -30 kV                                                                                                                                                                                                                                        |
|                              | Sheath liquid                           | Ammonium acetate (5 mM) in methanol/water (50 %v/v) containing 0.01 $\mu\text{M}$ Hexakis                                                                                                                                                     |
|                              | Mass flow rate                          | 10 $\mu\text{L}/\text{min}$                                                                                                                                                                                                                   |
|                              | Reference standards                     | $^{13}\text{C}$ isotopic ion of the protonated methanol dimer ( $2\text{CH}_3\text{COOH} - \text{H}$ ) $^-$ , $m/z$ 120.03834<br>Hexakis + deprotonated acetic acid ( $\text{M} + \text{CH}_3\text{COOH} - \text{H}$ ) $^-$ , $m/z$ 680.03554 |
|                              | Mass spectra                            | 1.5 cycles/s from $m/z$ 50 to 1000                                                                                                                                                                                                            |

Ref.) Hirayama A, Sugimoto M, Suzuki A, Hatakeyama Y, Enomoto A, Harada S, et al. Effects of processing and storage conditions on charged metabolomic profiles in blood. *Electrophoresis*. 2015.
