# Supplementary material for: Charged metabolite biomarkers of food intake assessed via plasma metabolomics in a population-based observational study in Japan
Source: PubMed Central journal article supplement (PMC7875413; doi:10.1371/journal.pone.0246456), 2021-02-10
Supplement: pone.0246456.s006.pdf [file pone.0246456.s006.pdf]

**S3 Table. List of metabolites.**

| Cations                         | Sub class <sup>a</sup> | Anions                      | Sub class <sup>a</sup> | Abbreviations                                 |
|---------------------------------|------------------------|-----------------------------|------------------------|-----------------------------------------------|
| Glycine                         | AA                     | Pyruvate                    | AKA                    | AA Amino acids, peptides, and analogs         |
| Trimethylamine- <i>N</i> -oxide | AO                     | Lactate                     | AHA                    | AHA alpha-Hydroxy acids and derivatives       |
| beta-Alanine                    | AA                     | 2-Oxobutyrate               | SKA                    | AKA alpha-Keto acids and derivatives          |
| Alanine                         | AA                     | Malonate                    | DCA                    | ALK Alkaloids and derivatives                 |
| Sarcosine                       | AA                     | 2-Hydroxybutyrate           | AHA                    | ALC Alcohols and polyols                      |
| 3-Aminoisobutyrate              | AA                     | 3-Hydroxybutyrate           | BHA                    | AM Amines                                     |
| 2-Aminobutyrate                 | AA                     | Fumarate                    | DCA                    | AO Aminoxides                                 |
| <i>N,N</i> -Dimethylglycine     | AA                     | 2-Oxoisopentanoate          | SKA                    | ARX Arylsulfates                              |
| Choline                         | QA                     | Hexanoate                   | FAE                    | BA Benzoic acids and derivatives              |
| Serine                          | AA                     | Succinate                   | DCA                    | BHA beta-Hydroxy acids and derivatives        |
| Creatinine                      | AA                     | Isethionate                 | OSA                    | CHO Carbohydrates and carbohydrate conjugates |
| Proline                         | AA                     | 5-Oxoproline                | AA                     | CAB Carbonyl compounds                        |
| Guanidinoacetate                | AA                     | Citraconate                 | FA                     | DCA Dicarboxylic acids and derivatives        |
| Valine                          | AA                     | Ketoleicine                 | SKA                    | FA Fatty acids and conjugates                 |
| Betaine                         | AA                     | 4-Acetylbutyrate            | FA                     | FAE Fatty acid esters                         |
| Threonine                       | AA                     | Heptanoate                  | FA                     | GKA gamma-Keto acids and derivatives          |
| Taurine                         | OSA                    | Glutarate                   | DCA                    | GP Glycerophosphates                          |
| Pipecolate                      | AA                     | Malate                      | BHA                    | GPC Glycerophosphocholines                    |
| Hydroxyproline                  | AA                     | Threonate                   | CHO                    | ICA Indolyl carboxylic acids and derivatives  |
| Creatine                        | AA                     | Ethanolamine phosphate      | PHE                    | LP Lipids and lipid-like molecules            |
| Isoleucine                      | AA                     | Octanoate                   | FA                     | MP Methoxyphenols                             |
| Leucine                         | AA                     | 2-Oxoglutarate              | GKA                    | OSA Organosulfonic acids and derivatives      |
| Asparagine                      | AA                     | Pelargonate                 | FA                     | PCA Pyridinecarboxylic acids and derivatives  |
| Ornithine                       | AA                     | Terephthalate               | BA                     | PHE Phosphate esters                          |
| Aspartate                       | AA                     | Urate                       | PR                     | PYN Pyrimidine nucleosides                    |
| Hypoxanthine                    | PR                     | Glycerophosphate            | GP                     | PR Purines and purine derivatives             |
| 1-Methylnicotinamide            | PCA                    | Decanoate                   | FA                     | QA Quaternary ammonium salts                  |
| Trigonelline                    | AL                     | trans-Aconitate             | TCA                    | SKA Short-chain keto acids and derivatives    |
| Proline betaine                 | AA                     | cis-Aconitate               | TCA                    | TCA Tricarboxylic acids and derivatives       |
| gamma-Butyrobetaine             | FA                     | <i>N</i> -Acetylaspartate   | AA                     |                                               |
| Glutamine                       | AA                     | Hippurate                   | BA                     |                                               |
| Lysine                          | AA                     | Homovanillate               | MP                     |                                               |
| Glutamic acid                   | AA                     | Azelate                     | FA                     |                                               |
| Methionine                      | AA                     | Isocitrate                  | TCA                    |                                               |
| Triethanolamine                 | AM                     | Citrate                     | TCA                    |                                               |
| Histidine                       | AA                     | Quinate                     | ALC                    |                                               |
| alpha-Amino adipate             | AA                     | Glucuronate                 | CHO                    |                                               |
| Carnitine                       | QA                     | Cysteine- <i>S</i> -sulfate | AA                     |                                               |
| Phenylalanine                   | AA                     | Galactarate                 | CHO                    |                                               |
| 3-Methylhistidine               | AA                     | 3-Indoxyl sulfate           | ARX                    |                                               |
| Arginine                        | AA                     |                             |                        |                                               |
| Guanidinosuccinate              | AA                     |                             |                        |                                               |
| Indole-3-acetate                | ICA                    |                             |                        |                                               |
| Citrulline                      | AA                     |                             |                        |                                               |
| Tyrosine                        | AA                     |                             |                        |                                               |
| Symmetric Dimethylarginine      | AA                     |                             |                        |                                               |
| Asymmetric Dimethylarginine     | AA                     |                             |                        |                                               |
| o-Acetylcarnitine               | LP                     |                             |                        |                                               |
| Tryptophan                      | AA                     |                             |                        |                                               |
| Kynurenine                      | CAB                    |                             |                        |                                               |
| Cysteineglutathione disulfide   | AA                     |                             |                        |                                               |
| Cystine                         | AA                     |                             |                        |                                               |
| Uridine                         | PYN                    |                             |                        |                                               |
| Glycerophosphorylcholine        | GPC                    |                             |                        |                                               |

<sup>a</sup> Ref.) The Human Metabolome Database (<http://www.hmdb.ca>)
