# Supplementary material for: Charged metabolite biomarkers of food intake assessed via plasma metabolomics in a population-based observational study in Japan
Source: PubMed Central journal article supplement (PMC7875413; doi:10.1371/journal.pone.0246456), 2021-02-10
Supplement: pone.0246456.s007.pdf [file pone.0246456.s007.pdf]

**S4 Table. Summary of cross-validation analyses**

| Food group                  | Minimum mean PRESS | Minimaizing number of factors | Optimal number of factors <sup>a</sup> | Cumulative $R^2X$ <sup>b</sup> | Cumulative $R^2Y$ <sup>c</sup> | Cumulative $Q^2$ <sup>d</sup> |
|-----------------------------|--------------------|-------------------------------|----------------------------------------|--------------------------------|--------------------------------|-------------------------------|
| Meat                        | 0.97               | 4                             | 3                                      | 0.20                           | 0.05                           | 0.07                          |
| Fish/seafood                | 0.91               | 4                             | 3                                      | 0.21                           | 0.10                           | 0.21                          |
| Eggs                        | 0.99               | 4                             | 1 (2)                                  | 0.11 (0.14)                    | 0.01 (0.03)                    | 0.01 (0.02)                   |
| Dairy                       | 0.89               | 11                            | 4                                      | 0.24                           | 0.13                           | 0.33                          |
| Soy products                | 0.92               | 10                            | 4                                      | 0.24                           | 0.10                           | 0.23                          |
| Carotenoide-rich vegetables | 0.88               | 4                             | 3                                      | 0.21                           | 0.13                           | 0.28                          |
| Other vegetables            | 0.87               | 10                            | 3                                      | 0.21                           | 0.14                           | 0.31                          |
| Fruits                      | 0.83               | 5                             | 4                                      | 0.24                           | 0.19                           | 0.47                          |
| Green tea                   | 0.97               | 3                             | 2                                      | 0.11                           | 0.04                           | 0.05                          |
| Coffee                      | 0.79               | 12                            | 4                                      | 0.24                           | 0.23                           | 0.55                          |
| Alcohol <sup>e</sup>        | 0.74               | 10                            | 3                                      | 0.14                           | 0.29                           | 0.53                          |

PRESS, predicted residual sum of squares.

<sup>a</sup> Smallest number of factor numbers provided by Van der Voet test with a  $T^2$  critical value of  $p > 0.10$ . For cases with an optimal factor number of less than two, the factor number was set to two and the result was shown in parentheses.

<sup>b</sup> Cumulative explained variation in the  $X$  matrix.

<sup>c</sup> Cumulative explained variation in the  $Y$  matrix.

<sup>d</sup> Cumulative predicted variation in the  $Y$  matrix.

<sup>e</sup> Data of male drinkers were used in the analysis.
